# Supplementary material for: Loss of CDK4/6 activity in S/G2 phase leads to cell cycle reversal
Source: PubMed Central journal article supplement (PMC10338338; doi:10.1038/s41586-023-06274-3), 2023-07-05
Supplement: 41586_2023_6274_MOESM3_ESM.pdf [file 41586_2023_6274_MOESM3_ESM.pdf]

# Supplementary Figure 1

Extended Data Fig. 1b

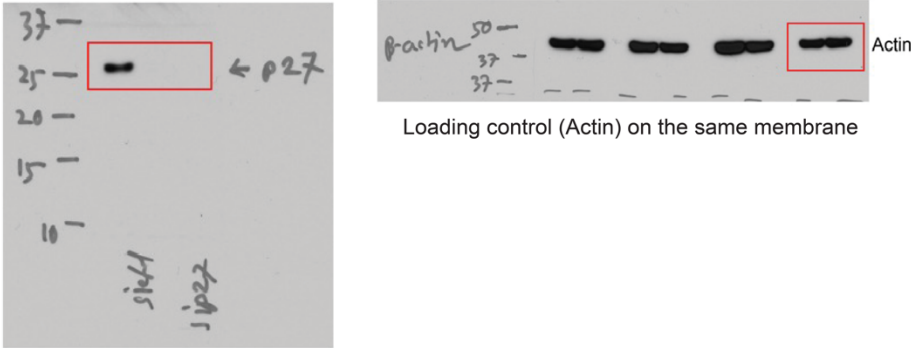

Extended Data Fig. 7b

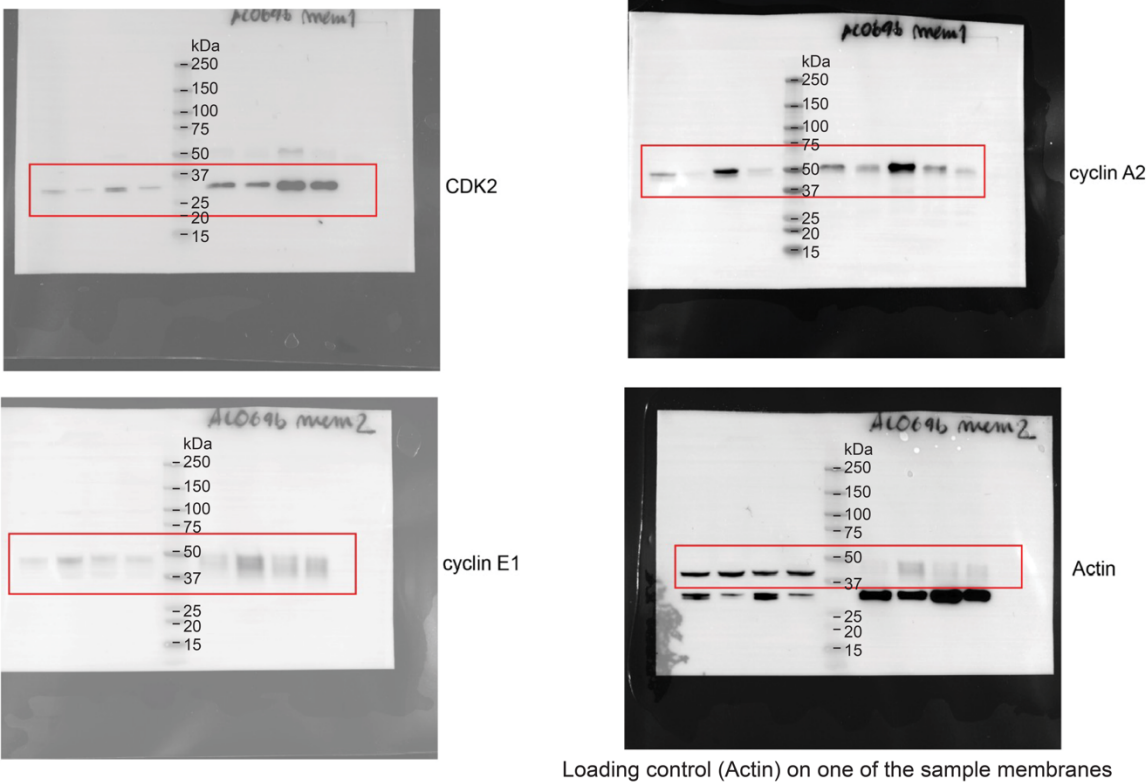

**Extended Data Fig. 7i**

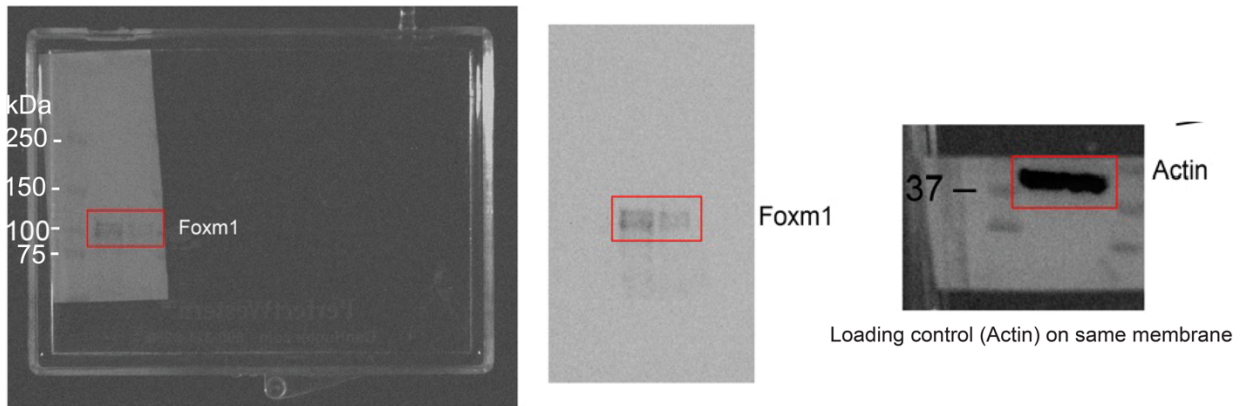

**Extended Data Fig. 8b**

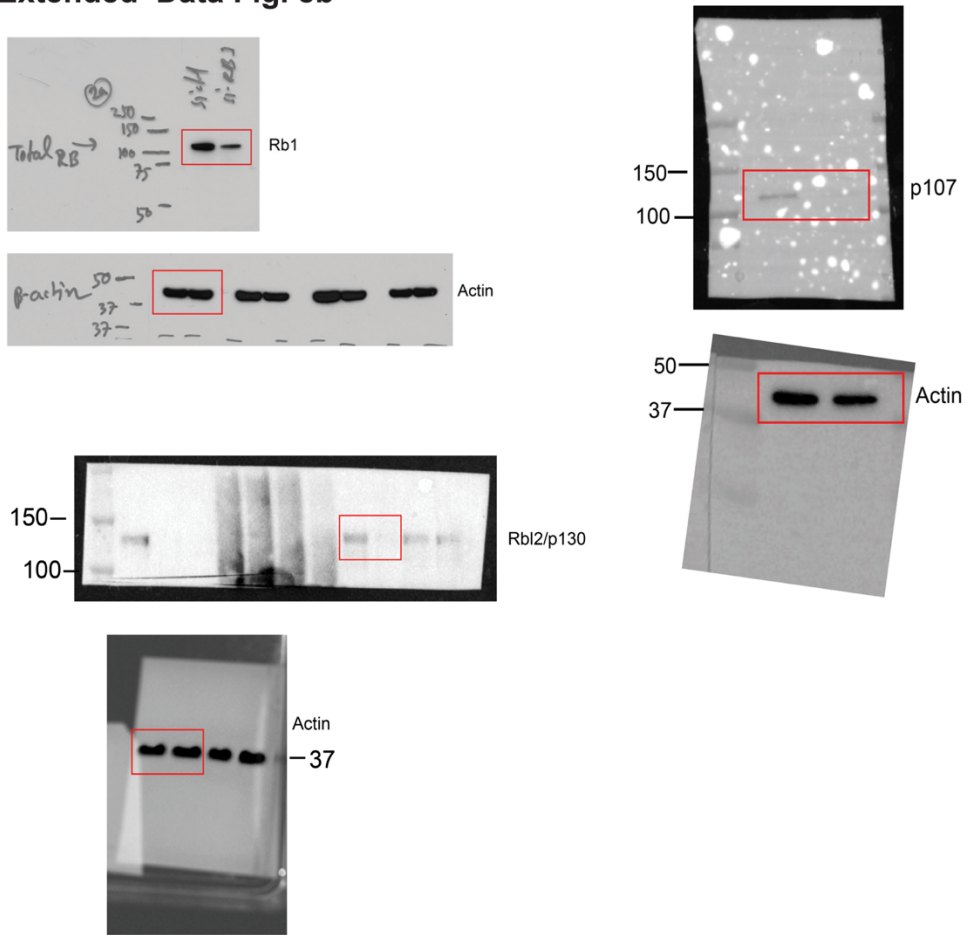

Loading control (Actin) on same membrane for each

**Extended Data Fig. 8d**

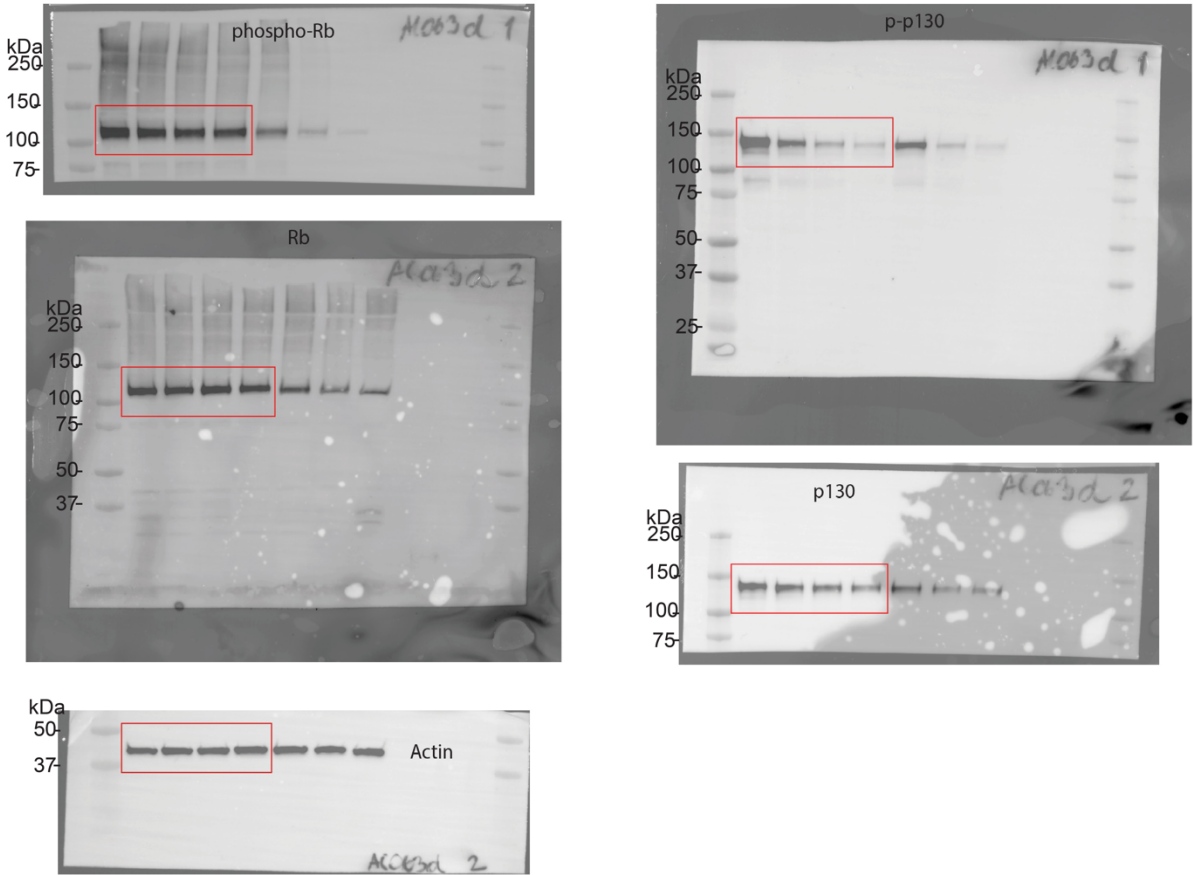

Loading control (Actin) on one of the sample membranes

**Extended Data Fig. 8e**

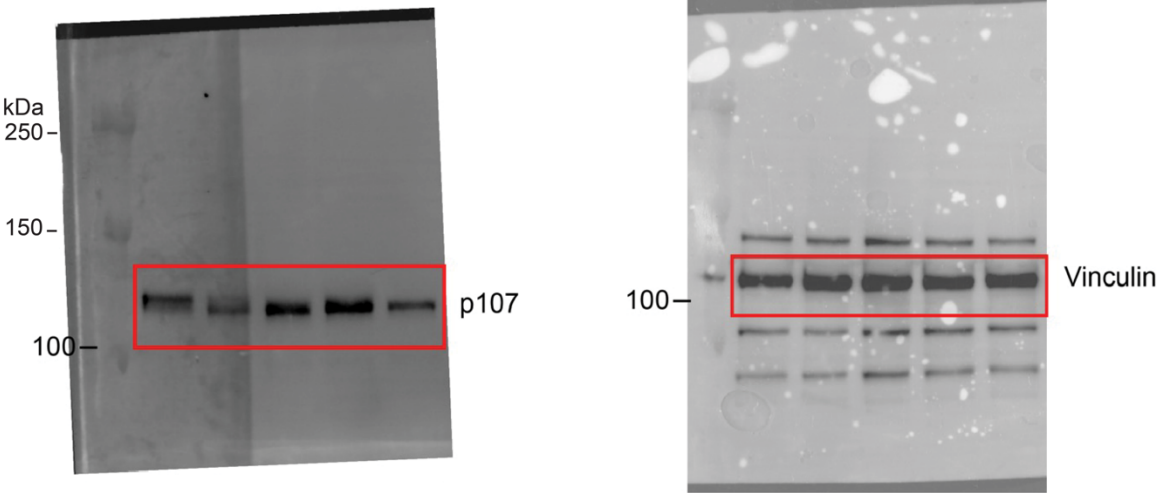

Loading control (Vinculin) on same membrane

# Extended Data Fig. 8f

Membrane 1

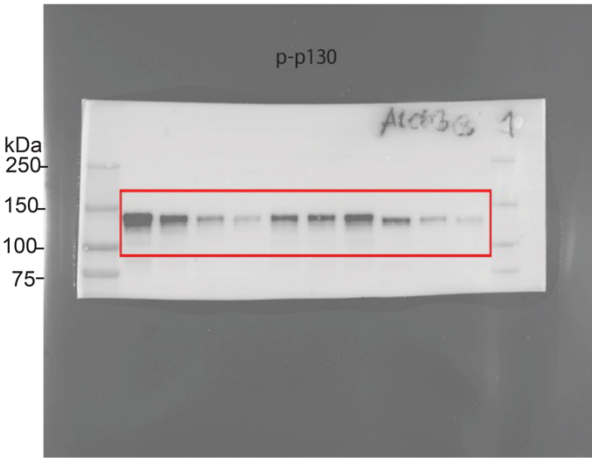

Membrane 2

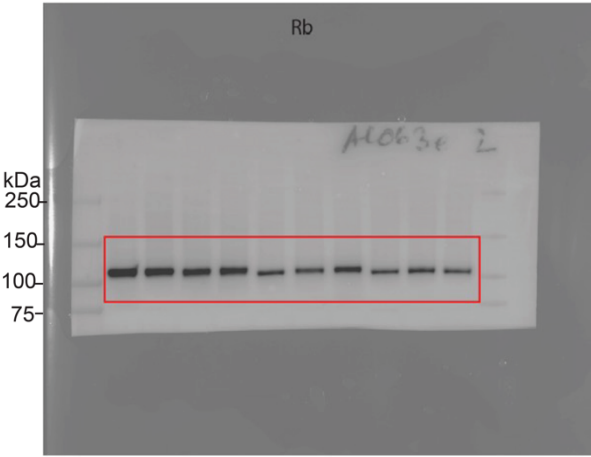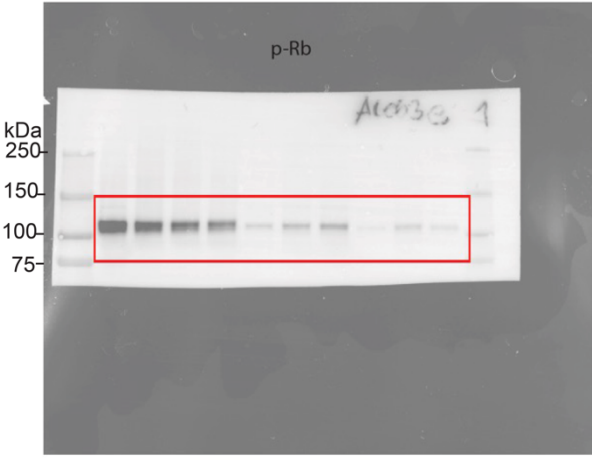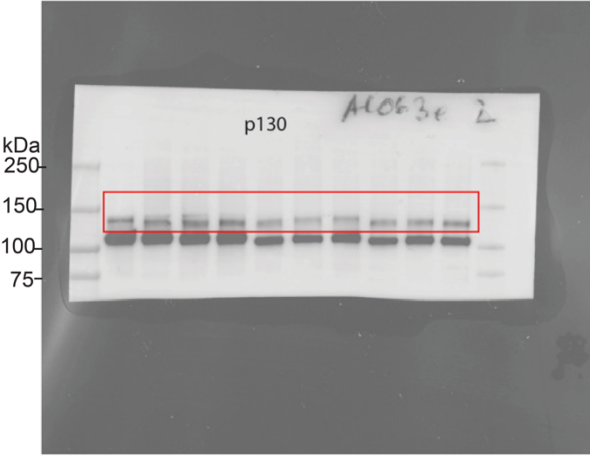

Membrane 1

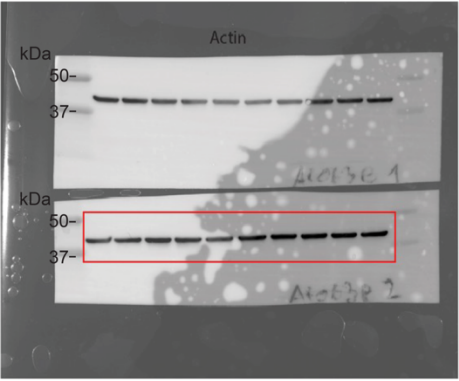

Membrane 2

Loading control (Actin) on one of the sample membranes

Extended Data Fig. 8g

IP: E2F4

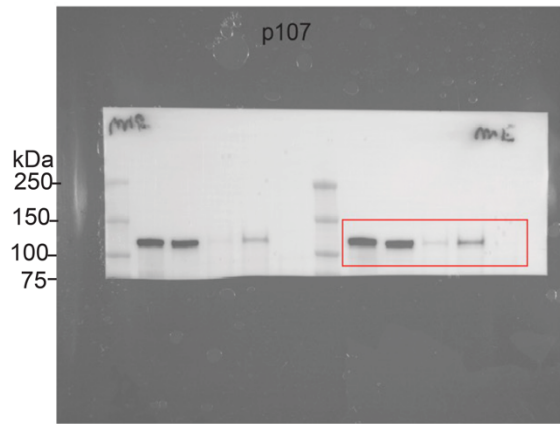

IP: p107

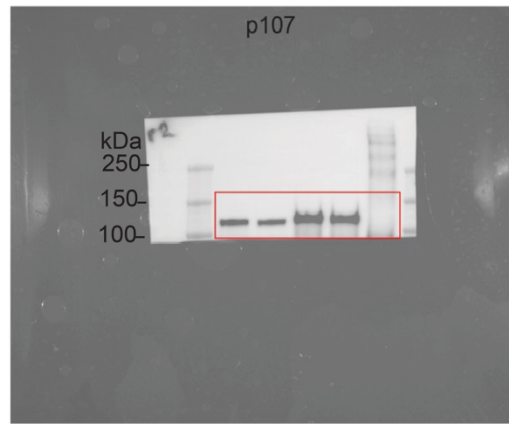

E2F4

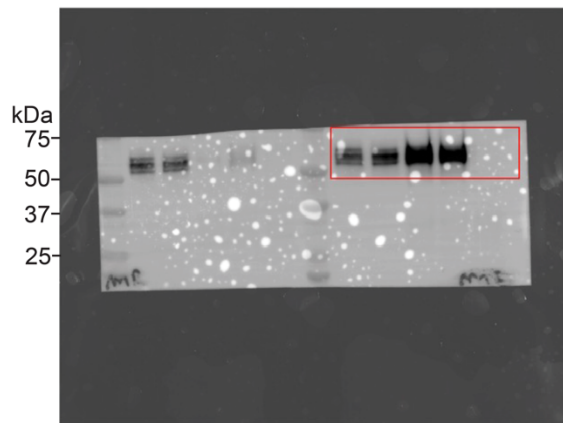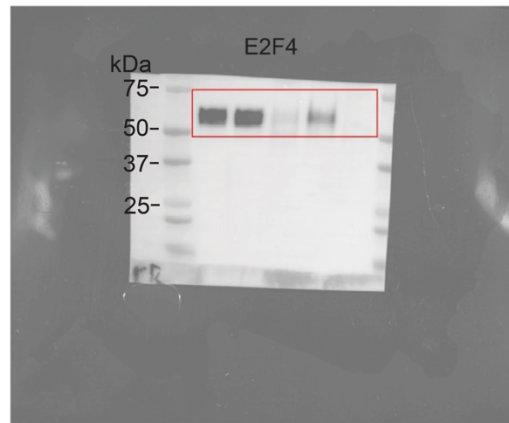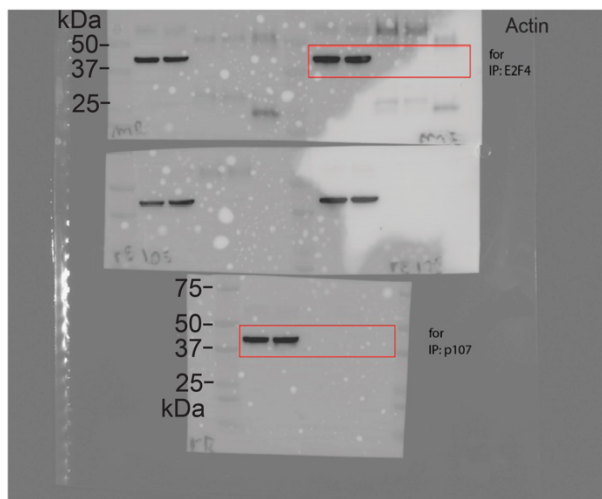

Loading control (Actin) on the same membrane

### Extended Data Fig. 8h

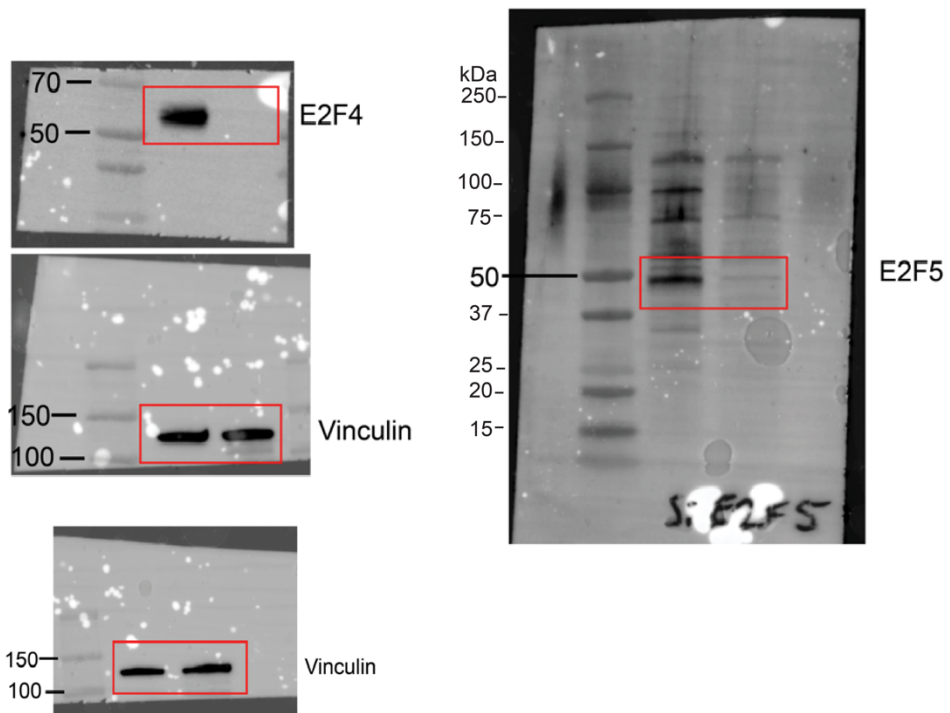

Loading control (Vinculin) on the same membrane

### Extended Data Fig. 9c

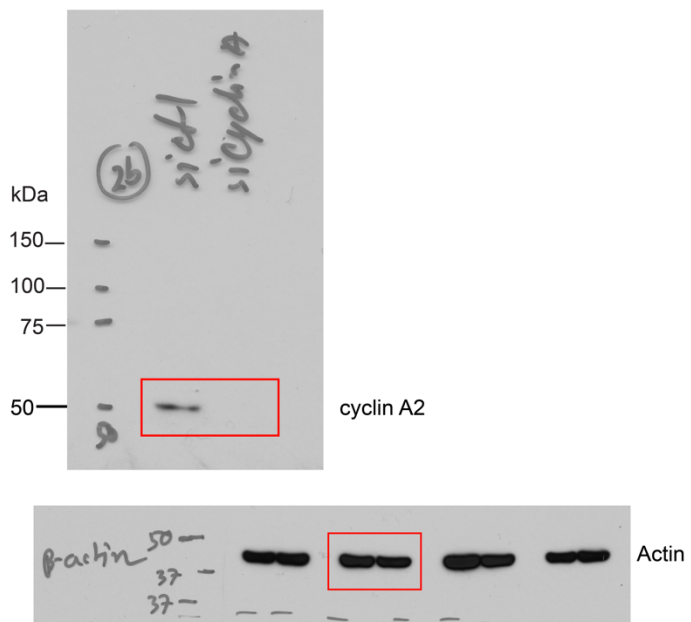

Loading control (Actin) on the same membrane
